# Supplementary material for: Natural Killer Cells Offer Differential Protection From Leukemia in Chinese Southern Han
Source: PubMed Central journal article supplement (PMC6646668; doi:10.3389/fimmu.2019.01646), 2019-07-16

## Supplementary Material

### Supplemental Figure 1. Characteristics of Chinese Southern Han leukemia patients and controls.

### Supplemental Figure 2. *HLA class I* frequencies of patients and controls

A. *HLA-A*, *-B* and *-C* frequencies of control (left) and patient (right) samples. There is no statistically significant difference between controls and patients for either locus (pairwise t-test, all  $p > 0.99$ ). The full leukemia patient set was used for this comparison (N=1061).

B. Frequencies for the ten most frequent *HLA class I* haplotypes in each group.

C. Allele frequencies for *HLA-B -21M* in control and patient groups.

### Supplemental Figure 3. Details of NK cytotoxicity assay

A-D. Representative FACS plots of the cytotoxic assay. (A) K562 target cells only, and K562 following incubation with NK cells from an individual having (B) *KIR AA* genotype (C) *AB4* genotype and (D) *BB117* genotype. CFSE+ 7AAD+ cells are the dead targets. The results correspond to Experiment 1 from panel E.

E. *KIR* genotypes of healthy donors from whom NK cells were extracted, and the results of cytotoxicity assays using leukemia cells as targets are shown. (Left) *KIR* genotypes are named according to allelefrequencies.net<sup>23</sup>. (Right) Target cells were (1) K562, and (2-8) leukemia cells obtained from patients at diagnosis (ALL or AML). The leukemic cells were obtained from bone marrow (BM) or PBMC. The numbers show the percentage of target cells that were killed. All experiments were performed in duplicate. All 15 of the NK-cell-donors were tested against the K562 cell line. As the leukemia cells were limited in quantity, it was not possible to test every donor NK cells against every leukemia target. Spontaneous lysis of target cells (e.g. Panel A) was measured for each target cell for each experiment and subtracted from the output to give the results shown.

F-I. Representative FACS plots of the CD107a assay. (F-G) CD3-CD56+ cells unstimulated. (H-I) CD3-CD56+ cells from the same donor incubated for 5 hours with K562 cells.

|            | Adult Leukemia |       |       |       | Pediatric Leukemia |       |
|------------|----------------|-------|-------|-------|--------------------|-------|
|            | Controls       | ALL   | AML   | CML   | ALL                | AML   |
| N          | 745            | 321   | 345   | 170   | 142                | 83    |
| Female (%) | 15.3           | 40.6  | 43.4  | 27.3  | 40.4               | 43.2  |
| Male (%)   | 84.7           | 59.4  | 56.6  | 72.7  | 59.6               | 56.8  |
| Mean age   | 32.7           | 29.8  | 32.9  | 31.4  | 10.9               | 12.25 |
| range      | 18-55          | 18-57 | 18-57 | 18-58 | 1-17               | 1-17  |

AML Classification by FAB (total)

| M0 | M1 | M2  | M3 | M4 | M5  | M6 | M7 | Unknown |
|----|----|-----|----|----|-----|----|----|---------|
| 0  | 23 | 117 | 4  | 71 | 106 | 16 | 3  | 93      |

| A       | Allele Frequency (%) |         |         | Allele Frequency (%) |         |         | Allele Frequency (%) |         |         | Allele Frequency (%) |         |         |
|---------|----------------------|---------|---------|----------------------|---------|---------|----------------------|---------|---------|----------------------|---------|---------|
|         | HLA-A                | Control | Patient | HLA-B                | Control | Patient | HLA-B                | Control | Patient | HLA-C                | Control | Patient |
| *01:01  | 1.75                 | 0.74    |         | *07:02               | 1.14    | 0.37    | *40:10               | 0.07    |         | *01:02               | 19.26   | 22.24   |
| *01:03  | 0.13                 |         |         | *07:05               | 0.67    | 0.32    | *40:40               | 0.07    |         | *01:03               | 0.34    | 0.46    |
| *02:01  | 8.05                 | 7.58    |         | *07:06               |         | 0.09    | *40:55               |         | 0.05    | *01:08               | 0.07    | 0.14    |
| *02:03  | 5.30                 | 8.46    |         | *07:10               | 0.07    | 0.05    | *41:01               | 0.07    |         | *02:02               | 0.27    | 0.23    |
| *02:05  | 0.20                 | 0.14    |         | *08:01               | 0.60    | 0.37    | *41:02               | 0.07    |         | *03:01               | 0.07    |         |
| *02:06  | 2.55                 | 3.72    |         | *13:01               | 7.92    | 8.36    | *44:02               | 0.34    | 0.28    | *03:02               | 8.26    | 8.23    |
| *02:07  | 12.01                | 14.29   |         | *13:02               | 2.68    | 1.93    | *44:03               | 0.87    | 1.10    | *03:03               | 4.90    | 3.91    |
| *02:09  |                      | 0.05    |         | *14:01               |         | 0.05    | *44:07               | 0.07    |         | *03:04               | 13.02   | 13.88   |
| *02:10  | 0.13                 | 0.14    |         | *14:02               | 0.13    |         | *45:01               | 0.07    | 0.05    | *03:17               | 0.07    | 0.05    |
| *02:17  | 0.07                 |         |         | *15:01               | 3.62    | 3.31    | *46:01               | 14.16   | 17.19   | *03:36               |         | 0.05    |
| *02:22  |                      | 0.05    |         | *15:02               | 5.37    | 6.53    | *48:01               | 1.07    | 0.64    | *03:38               | 0.07    |         |
| *02:53N |                      | 0.05    |         | *15:05               | 0.20    | 0.09    | *48:03               | 0.34    | 0.51    | *04:01               | 5.10    | 4.55    |
| *03:01  | 1.34                 | 0.51    |         | *15:07               | 0.27    | 0.14    | *49:01               | 0.07    |         | *04:03               | 1.54    | 1.75    |
| *03:02  | 0.13                 | 0.09    |         | *15:11               | 1.01    | 0.78    | *50:01               | 0.20    | 0.09    | *04:06               | 0.07    | 0.09    |
| *11:01  | 30.34                | 30.15   |         | *15:12               | 0.40    | 0.28    | *51:01               | 4.30    | 4.64    | *04:107              |         | 0.05    |
| *11:02  | 3.02                 | 2.99    |         | *15:18               | 0.60    | 0.51    | *51:02               | 1.48    | 1.29    | *04:15               | 0.07    |         |
| *11:03  | 0.07                 |         |         | *15:19               | 0.13    | 0.09    | *51:06               |         | 0.05    | *05:01               | 0.34    | 0.14    |
| *11:04  | 0.07                 |         |         | *15:21               | 0.13    |         | *51:07               |         | 0.05    | *06:02               | 4.30    | 2.80    |
| *11:06  | 0.00                 | 0.05    |         | *15:25               | 0.60    | 0.97    | *52:01               | 1.41    | 0.78    | *07:01               | 0.27    |         |
| *11:18  | 0.07                 |         |         | *15:27               | 0.27    | 0.51    | *54:01               | 3.42    | 3.17    | *07:02               | 18.26   | 19.53   |
| *11:36  | 0.07                 |         |         | *15:32               | 0.07    | 0.18    | *55:01               | 0.07    | 0.05    | *07:04               | 0.67    | 0.60    |
| *23:01  | 0.20                 | 0.14    |         | *15:58               | 0.07    |         | *55:02               | 3.36    | 3.54    | *07:06               | 0.20    | 0.69    |
| *24:02  | 15.84                | 15.21   |         | *18:01               | 0.40    | 0.14    | *55:04               |         | 0.09    | *07:19               | 0.20    |         |
| *24:03  | 0.07                 | 0.14    |         | *18:02               |         | 0.18    | *55:12               | 0.07    |         | *07:43               | 0.07    |         |
| *24:07  | 0.20                 | 0.78    |         | *27:04               | 1.81    | 1.29    | *56:01               | 1.14    | 0.97    | *07:66               |         | 0.05    |
| *24:10  | 0.07                 | 0.14    |         | *27:05               | 0.20    | 0.28    | *56:03               |         | 0.28    | *07:67               |         | 0.05    |
| *24:20  |                      | 0.05    |         | *27:06               | 0.20    | 0.05    | *56:04               | 0.07    | 0.28    | *08:01               | 8.93    | 9.05    |
| *24:64  |                      | 0.05    |         | *27:07               | 0.20    |         | *56:10               |         | 0.05    | *08:02               | 0.13    | 0.05    |
| *26:01  | 2.28                 | 1.38    |         | *35:01               | 2.35    | 1.56    | *57:01               | 0.67    | 0.18    | *08:03               | 0.40    | 0.14    |
| *29:01  | 0.67                 | 0.32    |         | *35:02               | 0.07    | 0.09    | *58:01               | 8.32    | 8.09    | *12:02               | 2.68    | 2.16    |
| *29:02  | 0.07                 |         |         | *35:03               | 0.54    | 0.32    | *58:02               |         | 0.05    | *12:03               | 2.42    | 1.33    |
| *30:01  | 2.62                 | 1.70    |         | *35:05               | 0.34    | 1.06    | *59:01               | 0.07    |         | *14:02               | 3.62    | 4.23    |
| *30:04  |                      | 0.05    |         | *35:08               | 0.07    |         | *67:01               | 0.47    | 0.09    | *14:03               | 0.34    | 0.28    |
| *30:07  |                      | 0.05    |         | *37:01               | 0.87    | 0.51    | *81:02               | 0.20    |         | *15:02               | 3.15    | 2.80    |
| *31:01  | 2.82                 | 1.52    |         | *38:01               | 0.27    | 0.14    |                      |         |         | *15:04               |         | 0.05    |
| *31:02  |                      | 0.05    |         | *38:02               | 3.15    | 5.06    |                      |         |         | *15:05               | 0.60    | 0.32    |
| *32:01  | 0.87                 | 0.18    |         | *39:01               | 1.75    | 1.52    |                      |         |         | *16:02               | 0.20    | 0.09    |
| *33:01  | 0.20                 |         |         | *39:05               | 0.13    | 0.14    |                      |         |         | *16:04               |         | 0.05    |
| *33:03  | 8.26                 | 8.73    |         | *39:09               |         | 0.05    |                      |         |         | *17:01               | 0.13    |         |
| *34:01  | 0.07                 |         |         | *40:01               | 15.91   | 16.87   |                      |         |         |                      |         |         |
| *68:01  | 0.34                 | 0.28    |         | *40:02               | 1.14    | 1.19    |                      |         |         |                      |         |         |
| *74:01  | 0.07                 |         |         | *40:03               | 0.07    | 0.18    |                      |         |         |                      |         |         |
| *74:02  | 0.07                 | 0.28    |         | *40:06               | 2.08    | 0.92    |                      |         |         |                      |         |         |

| B      | Controls |        |       | Haplotype frequency (%) | Patients |        |       | Haplotype frequency (%) |
|--------|----------|--------|-------|-------------------------|----------|--------|-------|-------------------------|
|        | HLA-A    | HLA-B  | HLA-C |                         | HLA-A    | HLA-B  | HLA-C |                         |
| *02:07 | *46:01   | *01:02 | 8.28  | *02:07                  | *46:01   | *01:02 | 10.11 |                         |
| *33:03 | *58:01   | *03:02 | 6.43  | *33:03                  | *58:01   | *03:02 | 6.82  |                         |
| *11:01 | *40:01   | *07:02 | 5.19  | *11:01                  | *40:01   | *07:02 | 5.21  |                         |
| *11:01 | *13:01   | *03:04 | 4.40  | *11:01                  | *15:02   | *08:01 | 4.61  |                         |
| *11:01 | *15:02   | *08:01 | 3.30  | *11:01                  | *13:01   | *03:04 | 3.95  |                         |
| *11:01 | *46:01   | *01:02 | 2.37  | *02:03                  | *38:02   | *07:02 | 3.19  |                         |
| *30:01 | *13:02   | *06:02 | 2.21  | *11:01                  | *46:01   | *01:02 | 2.63  |                         |
| *24:02 | *40:01   | *03:04 | 1.91  | *24:02                  | *40:01   | *03:04 | 2.12  |                         |
| *24:02 | *40:01   | *07:02 | 1.71  | *11:01                  | *51:01   | *14:02 | 1.77  |                         |
| *02:03 | *38:02   | *07:02 | 1.46  | *24:02                  | *40:01   | *07:02 | 1.57  |                         |
| *11:01 | *40:01   | *03:04 | 1.27  | *30:01                  | *13:02   | *06:02 | 1.52  |                         |

| HLA-B -21M Allele Freq. (%) |       |
|-----------------------------|-------|
| Controls                    | 10.00 |
| Patients                    | 9.38  |
| ALL                         | 9.81  |
| AML                         | 9.46  |
| CML                         | 8.43  |

Supplemental Figure 2

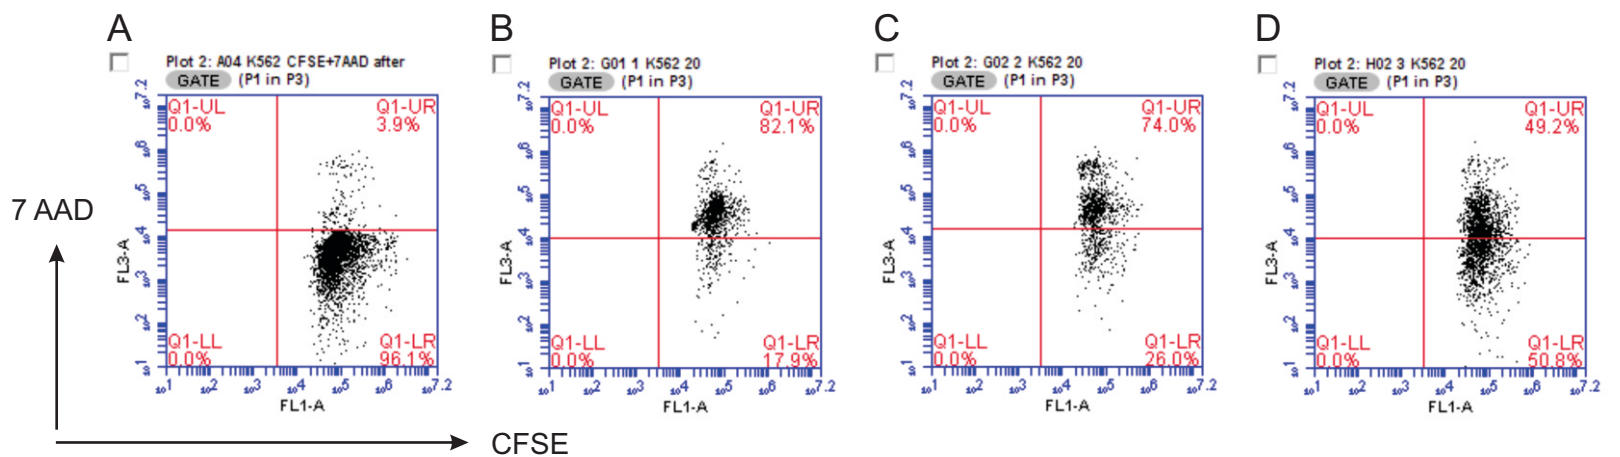

**E**

| Experiment | NK cells |            |    |     |       | Target leukemia cells |           |           |      |           |           |      |           |           |      |           |           |      |           |           |      |           |           |      |           |           |      |           |           |   |           |           |
|------------|----------|------------|----|-----|-------|-----------------------|-----------|-----------|------|-----------|-----------|------|-----------|-----------|------|-----------|-----------|------|-----------|-----------|------|-----------|-----------|------|-----------|-----------|------|-----------|-----------|---|-----------|-----------|
|            | Donor    | KIR ligand |    |     |       | KIR Genotype          | Patient   | 1         |      |           | 2         |      |           | 3         |      |           | 4         |      |           | 5         |      |           | 6         |      |           | 7         |      |           | 8         |   |           |           |
|            |          | C1         | C2 | Bw4 | A3/11 |                       | Diagnosis | 1         | 2    | $\bar{x}$ | 1         | 2    | $\bar{x}$ | 1         | 2    | $\bar{x}$ | 1         | 2    | $\bar{x}$ | 1         | 2    | $\bar{x}$ | 1         | 2    | $\bar{x}$ | 1         | 2    | $\bar{x}$ | 1         | 2 | $\bar{x}$ |           |
|            |          | Source     | C1 | C2  | Bw4   |                       | A3/11     | Source    | 1    | 2         | $\bar{x}$ | 1    | 2         | $\bar{x}$ | 1    | 2         | $\bar{x}$ | 1    | 2         | $\bar{x}$ | 1    | 2         | $\bar{x}$ | 1    | 2         | $\bar{x}$ | 1    | 2         | $\bar{x}$ | 1 | 2         | $\bar{x}$ |
| 1          | +        | -          | -  | +   | AA1   | 1                     | 2         | $\bar{x}$ | 1    | 2         | $\bar{x}$ | 1    | 2         | $\bar{x}$ | 1    | 2         | $\bar{x}$ | 1    | 2         | $\bar{x}$ | 1    | 2         | $\bar{x}$ | 1    | 2         | $\bar{x}$ | 1    | 2         | $\bar{x}$ | 1 | 2         | $\bar{x}$ |
| 2          | +        | -          | -  | -   | AA1   | 78.2                  | 78.4      | 78.3      | 32.4 | 21.6      | 27.0      | 21.2 | 26.4      | 23.8      |      |           |           |      |           |           |      |           |           |      |           |           |      |           |           |   |           |           |
| 3          | +        | -          | +  | -   | AB4   | 70.1                  | 46.0      | 58.0      | 25.3 | 29.6      | 27.4      | 20.9 | 24.6      | 22.8      |      |           |           |      |           |           |      |           |           |      |           |           |      |           |           |   |           |           |
| 4          | +        | -          | -  | -   | BB117 | 45.3                  | 46.5      | 45.9      | 20.4 | 26.9      | 23.7      | 25.0 | 20.2      | 22.6      |      |           |           |      |           |           |      |           |           |      |           |           |      |           |           |   |           |           |
| 5          | +        | -          | -  | +   | AA1   | 58.9                  | 65.6      | 62.3      | 31.3 | 28.3      | 29.8      | 32.8 | 29.5      | 31.2      |      |           |           |      |           |           |      |           |           |      |           |           |      |           |           |   |           |           |
| 6          | +        | -          | -  | -   | AB6   | 59.3                  | 57.8      | 58.6      | 15.8 | 19.0      | 17.4      | 18.8 | 16.8      | 17.8      |      |           |           |      |           |           |      |           |           |      |           |           |      |           |           |   |           |           |
| 7          | +        | +          | +  | -   | AB4   | 60.6                  | 53.6      | 57.1      | 20.5 | 24.1      | 22.3      | 17.4 | 15.2      | 16.3      |      |           |           |      |           |           |      |           |           |      |           |           |      |           |           |   |           |           |
| 8          | +        | -          | +  | +   | AA1   | 71.5                  | 46.5      | 59.0      |      |           |           |      |           |           | 39.5 | 29.1      | 34.3      | 43.4 | 45.5      | 44.4      | 31.9 | 33.3      | 32.6      |      |           |           |      |           |           |   |           |           |
| 9          | +        | -          | -  | +   | AA1   | 67.5                  | 59.8      | 63.6      |      |           |           |      |           |           | 32.9 | 29.7      | 31.3      | 39.6 | 36.1      | 37.8      | 31.5 | 32.4      | 31.9      |      |           |           |      |           |           |   |           |           |
| 10         | +        | +          | +  | -   | BB69  | 45.3                  | 46.5      | 48.5      |      |           |           |      |           |           | 26.3 | 25.1      | 25.7      | 24.3 | 21.5      | 22.9      | 18.9 | 18.3      | 18.6      |      |           |           |      |           |           |   |           |           |
| 11         | +        | +          | +  | +   | BB70  | 60.1                  | 57.4      | 58.8      |      |           |           |      |           |           | 23.2 | 25.6      | 24.4      | 32.9 | 26.0      | 29.5      | 28.4 | 29.4      | 28.9      |      |           |           |      |           |           |   |           |           |
| 12         | +        | -          | +  | -   | AA1   | 66.9                  | 59.5      | 63.2      |      |           |           |      |           |           | 21.3 | 12.7      | 17.0      | 27.5 | 16.7      | 22.1      |      |           |           | 36.9 | 38.1      | 37.5      |      |           |           |   |           |           |
| 13         | +        | -          | -  | +   | AB2   | 42.1                  | 49.4      | 45.7      |      |           |           |      |           |           | 13.8 | 11.7      | 12.8      | 15.7 | 4.8       | 10.3      |      |           |           | 31.2 | 33.6      | 32.4      |      |           |           |   |           |           |
| 14         | +        | -          | -  | +   | BB76  | 19.7                  | 12.3      | 16.0      |      |           |           |      |           |           | 13.7 | 9.4       | 11.5      | 0.7  | 1.3       | 1.0       |      |           |           | 17.2 | 18.1      | 17.6      |      |           |           |   |           |           |
| 15         | +        | +          | +  | -   | AA1   | 62.3                  | 63.4      | 62.9      |      |           |           |      |           |           | 36.5 | 35.2      | 35.9      | 20.6 | 19.2      | 19.9      |      |           |           | 13.9 | 14.7      | 14.3      | 38.6 | 36.7      | 37.7      |   |           |           |
| 16         | +        | +          | +  | -   | AB3   | 53.1                  | 57.6      | 55.3      |      |           |           |      |           |           | 32.5 | 30.2      | 31.3      | 18.3 | 18.5      | 18.4      |      |           |           | 9.4  | 9.2       | 9.3       | 27.0 | 28.3      | 27.6      |   |           |           |

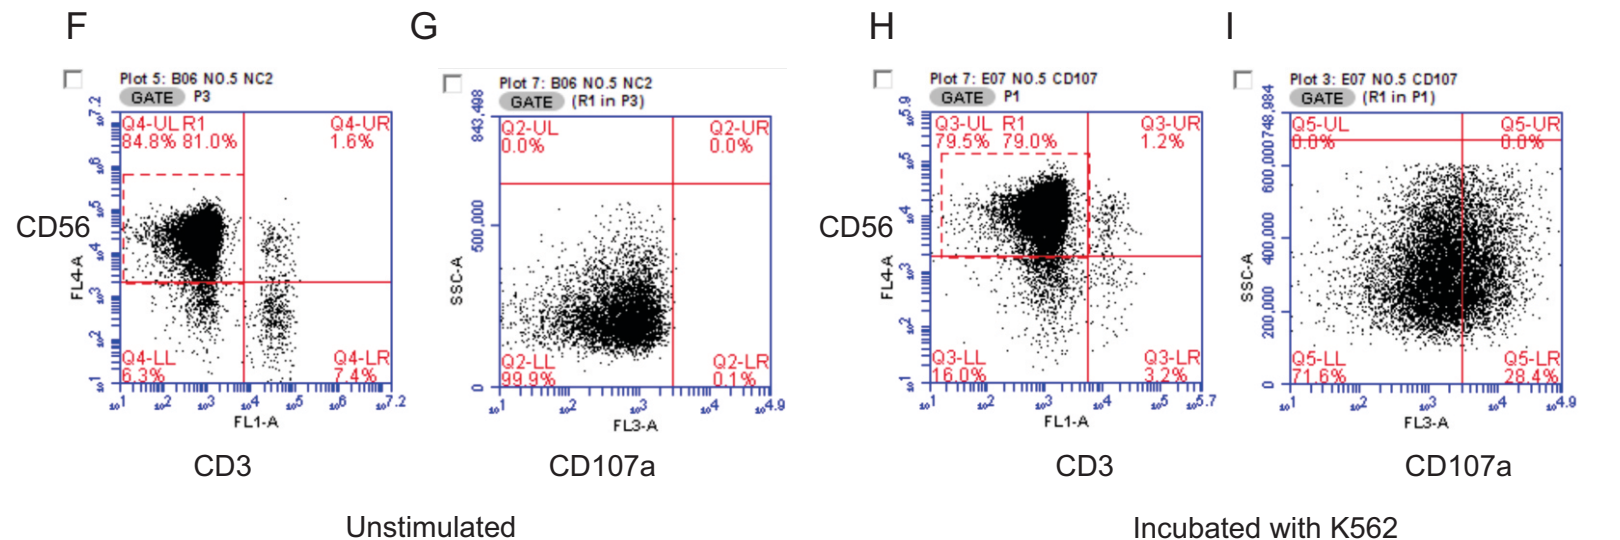

Supplement: Data_Sheet_1.pdf [file Data_Sheet_1.pdf]
